# Supplementary material for: Three-Dimensional Electrode-Enhanced Ozone Catalytic Oxidation for Thiamethoxam Wastewater Treatment: Performance, Kinetics, and Pathway
Source: MDPI journal article supplement (doi:10.3390/catal14040245), 2024-04-07
Supplement: s1 [file s1]

## **Table Captions**

**Table S1.** Chemicals used in this experiment.

**Table S2.** Design and results of response surface analysis test.

**Table S3.** Analysis of variance of the quadratic model.

## **Figure Captions**

**Figure S1.** Gas chromatogram of the thiamethoxam degradation products at different time.

**Figure S2.** Mass spectrum of thiamethoxam and its intermediate products.

**Table S1.** Chemicals used in this experiment.

| Drug names                  | Formula                                                                    | CAS number | Purity(%)     | Source                                        |
|-----------------------------|----------------------------------------------------------------------------|------------|---------------|-----------------------------------------------|
| Ammonium ferrous sulfate    | $\text{Fe}(\text{NH}_4)_2 \cdot (\text{SO}_4)_2 \cdot 6\text{H}_2\text{O}$ | 7783-85-9  | $\geq 99.5\%$ | Sinopharm Chemical Reagents Co., Ltd. (China) |
| Aluminium potassium sulfate | $\text{KAl}(\text{SO}_4)_2 \cdot 12\text{H}_2\text{O}$                     | 7784-24-9  | $\geq 99.5\%$ | Sinopharm Chemical Reagents Co., Ltd. (China) |
| Silver sulfate              | $\text{Ag}_2\text{SO}_4$                                                   | 10294-26-5 | $\geq 99.7\%$ | Sinopharm Chemical Reagents Co., Ltd. (China) |
| Potassium dichromate        | $\text{K}_2\text{Cr}_2\text{O}_7$                                          | 7778-50-9  | $\geq 99.8\%$ | Sinopharm Chemical Reagents Co., Ltd. (China) |
| Ferrous sulfate             | $\text{FeSO}_4 \cdot 7\text{H}_2\text{O}$                                  | 7720-78-7  | $\geq 99.0\%$ | Sinopharm Chemical Reagents Co., Ltd. (China) |
| 1, 10-Phenanthroline        | $\text{C}_{12}\text{H}_8\text{N}_2 \cdot \text{H}_2\text{O}$               | 66-71-7    | $\geq 99\%$   | Sinopharm Chemical Reagents Co., Ltd. (China) |
| Hydrochloric acid           | HCl                                                                        | 7647-01-0  | 36.0-38.0%    | Jinshan Chemical Reagent Co., Ltd (China)     |
| Sulfuric acid               | $\text{H}_2\text{SO}_4$                                                    | 7664-93-9  | 95.0~98.0%    | Jinshan Chemical Reagent Co., Ltd (China)     |
| Ammonium molybdate          | $(\text{NH}_4)_6\text{Mo}_7\text{O}_{24} \cdot 4\text{H}_2\text{O}$        | 12054-85-2 | $\geq 99.0\%$ | Kemi Ou Chemical Reagent Co., Ltd (China)     |
| Sodium hydroxide            | NaOH                                                                       | 1310-73-2  | 96.0%         | Kemi Ou Chemical Reagent Co., Ltd (China)     |
| Mercuric sulfate            | $\text{HgSO}_4$                                                            | 7783-35-9  | $\geq 98.0\%$ | Kemi Ou Chemical Reagent Co., Ltd (China)     |
| Sodium chloride             | NaCl                                                                       | 7647-14-5  | $\geq 99.5\%$ | Kemi Ou Chemical Reagent Co., Ltd (China)     |

**Table S2.** Design and results of response surface analysis test.

| Experiment<br>number | A: Particle electrode<br>amount (g/L) | B: Current density<br>(A/m <sup>2</sup> ) | C: Ozone<br>concentration<br>(g/h) | COD removal<br>rate (%) |
|----------------------|---------------------------------------|-------------------------------------------|------------------------------------|-------------------------|
| 1                    | 15                                    | 32                                        | 12                                 | 89.74                   |
| 2                    | 15                                    | 24                                        | 14                                 | 86.23                   |
| 3                    | 25                                    | 24                                        | 10                                 | 81.60                   |
| 4                    | 15                                    | 24                                        | 10                                 | 86.15                   |
| 5                    | 20                                    | 32                                        | 14                                 | 82.41                   |
| 6                    | 20                                    | 24                                        | 12                                 | 93.32                   |
| 7                    | 20                                    | 16                                        | 14                                 | 79.45                   |
| 8                    | 20                                    | 16                                        | 10                                 | 76.83                   |
| 9                    | 25                                    | 32                                        | 12                                 | 84.25                   |
| 10                   | 20                                    | 32                                        | 10                                 | 81.99                   |
| 11                   | 20                                    | 24                                        | 12                                 | 93.08                   |
| 12                   | 25                                    | 24                                        | 14                                 | 86.77                   |
| 13                   | 20                                    | 24                                        | 12                                 | 95.38                   |
| 14                   | 20                                    | 24                                        | 12                                 | 94.17                   |
| 15                   | 15                                    | 16                                        | 12                                 | 82.15                   |
| 16                   | 25                                    | 16                                        | 12                                 | 81.82                   |
| 17                   | 20                                    | 24                                        | 12                                 | 93.17                   |

**Table S3.** Analysis of variance of the quadratic model.

| Source                                     | Sum of squares                        | df           | Mean square | F-value | P-value | Significance value |
|--------------------------------------------|---------------------------------------|--------------|-------------|---------|---------|--------------------|
| Model                                      | 530.47                                | 9            | 58.94       | 81.26   | <0.0001 | **                 |
| X <sub>1</sub> : Particle electrode amount | 12.10                                 | 1            | 12.10       | 16.69   | 0.0047  | **                 |
| X <sub>2</sub> : Current density           | 41.09                                 | 1            | 41.09       | 56.64   | 0.0001  | **                 |
| X <sub>3</sub> : Ozone concentration       | 8.59                                  | 1            | 8.59        | 11.84   | 0.0108  | *                  |
| X <sub>1</sub> X <sub>2</sub>              | 6.68                                  | 1            | 6.68        | 9.21    | 0.0190  | *                  |
| X <sub>1</sub> X <sub>3</sub>              | 6.48                                  | 1            | 6.48        | 8.93    | 0.0203  | *                  |
| X <sub>2</sub> X <sub>3</sub>              | 1.21                                  | 1            | 1.21        | 1.67    | 0.2375  |                    |
| X <sub>1</sub> <sup>2</sup>                | 20.00                                 | 1            | 20.00       | 27.57   | 0.0012  | **                 |
| X <sub>2</sub> <sup>2</sup>                | 218.09                                | 1            | 218.09      | 300.66  | <0.0001 | **                 |
| X <sub>3</sub> <sup>2</sup>                | 177.73                                | 1            | 177.73      | 245.02  | <0.0001 | **                 |
| Residual                                   | 5.08                                  | 7            | 0.7254      |         |         |                    |
| Lack of Fit                                | 1.47                                  | 3            | 0.4904      | 0.5439  | 0.6779  |                    |
| Pure Error                                 | 3.61                                  | 4            | 0.9016      |         |         |                    |
| Cor Total                                  | 535.55                                | 16           |             |         |         |                    |
| R <sup>2</sup> =0.9905                     | R <sup>2</sup> <sub>Adj</sub> =0.9783 | C.V.%=0.9858 |             |         |         |                    |

Note: \* Significant (P<0.05); \*\* Extremely significant (P<0.01).

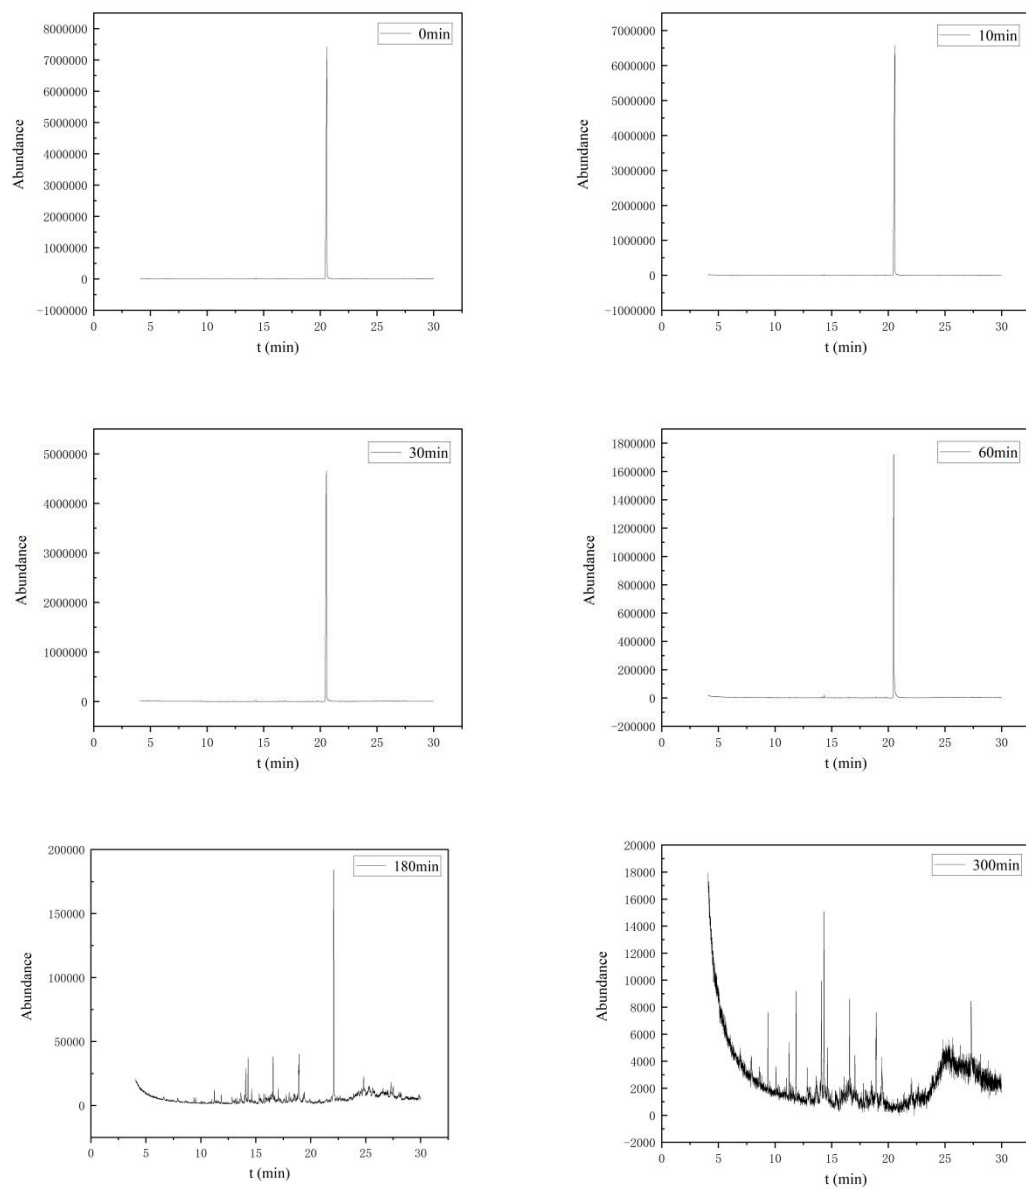

**Figure S1.** Gas chromatogram of the thiamethoxam degradation products at different time

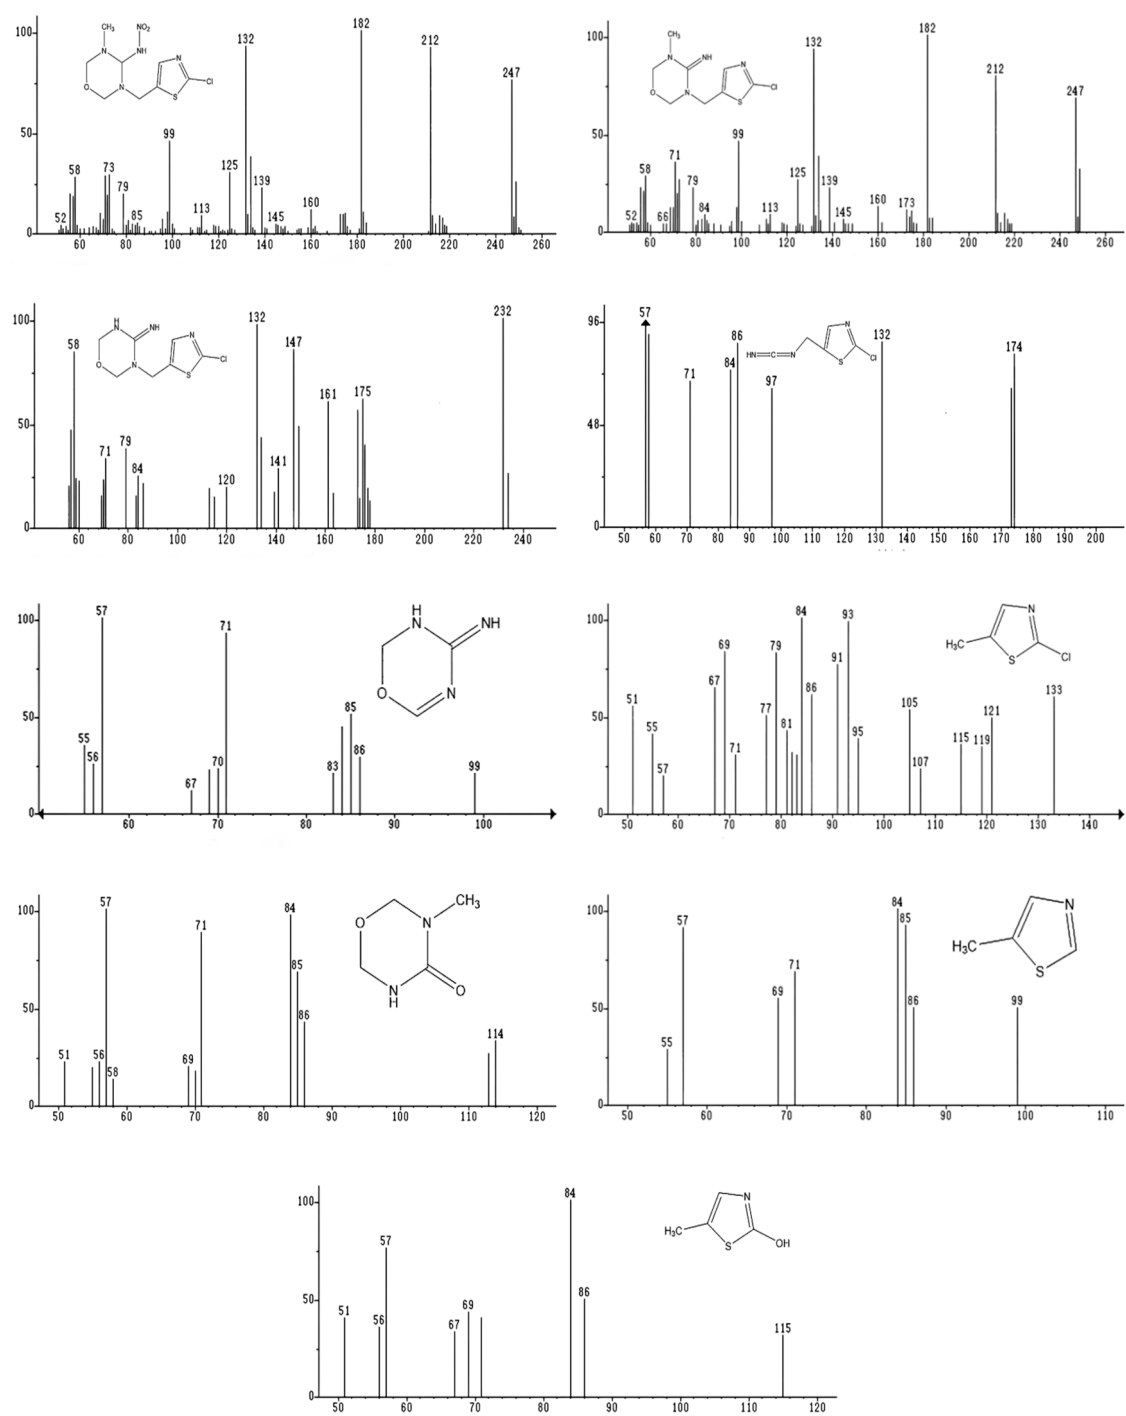

**Figure S2.** Mass spectrum of thiamethoxam and its intermediate products
